# Supplementary material
Source: Springer Nature journal article supplement (https://www.springermedizin.de/resource/supplementary/13012_2012_594_MOESM10_ESM.pdf/9630336)
Supplement: MOESM10 [file 9630336]

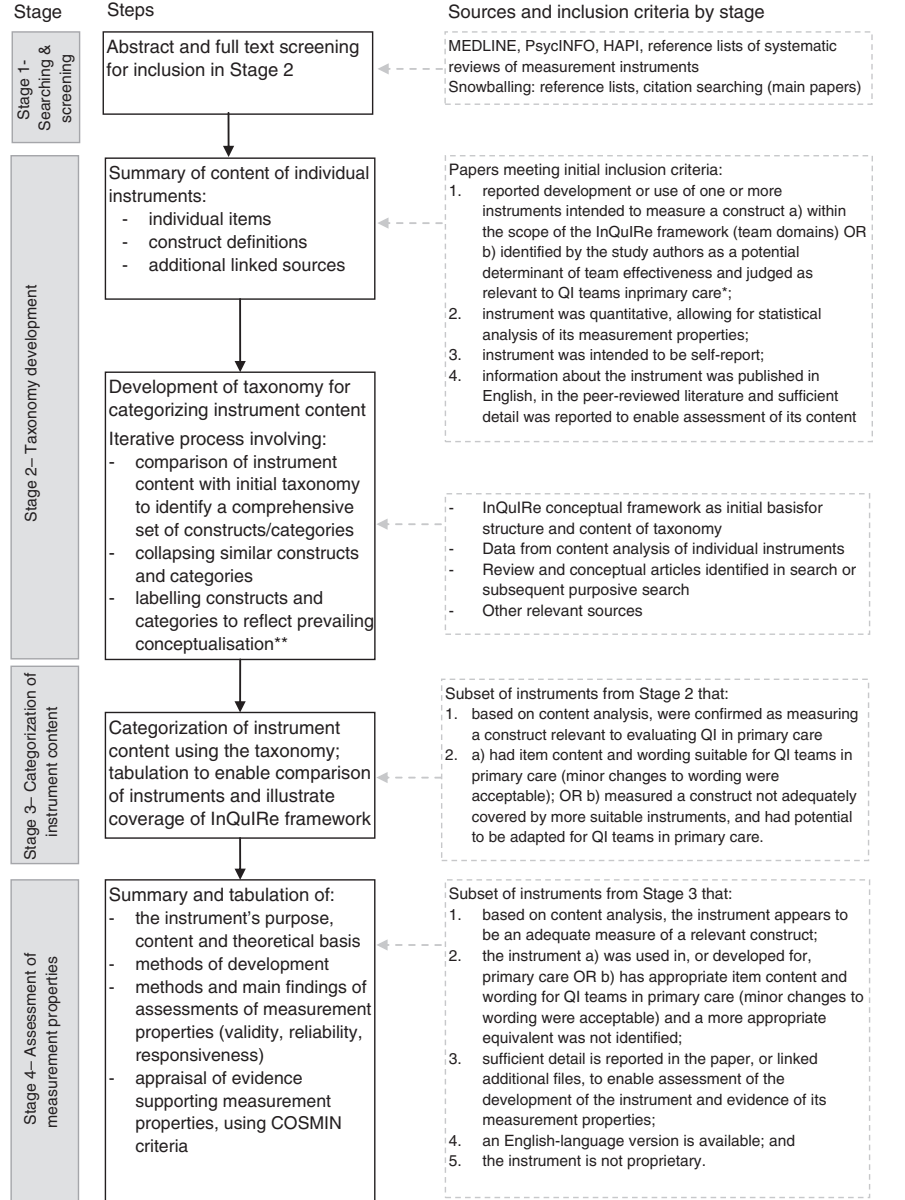

\* External factors (e.g. financing, accreditation) were excluded as these are likely to be specific to the local health system

\*\* Extent to which this was possible depended on the existence of agreed construct definitions in multiple included studies or, alternatively, in synthesised sources from the extant literature (i.e. recent or seminal review article)
